# Supplementary material
Source: MDPI journal article supplement (https://www.mdpi.com/2073-4433/15/5/587)
Supplement: s1 [file s1]

# Supplementary Materials: Development of a Refrigerant-Free Cryotrap Unit for Pre-Concentration of Biogenic Volatile Organic Compounds in Air

Xiaoxiao Ding <sup>1</sup>, Daocheng Gong <sup>1,2,3</sup>, Qinqin Li <sup>1</sup>, Shiwei Liu <sup>1</sup>, Shuo Deng <sup>1</sup>,  
Hao Wang <sup>1,2,3,\*</sup>, Hongjie Li <sup>1</sup> and Boguang Wang <sup>1,2,3,\*</sup>

<sup>1</sup> College of Environment and Climate, Institute for Environmental and Climate Research, Jinan University, Guangzhou 511443, China

<sup>2</sup> Guangdong Provincial Observation and Research Station for Atmospheric Environment and Carbon Neutrality in Nanling Forests, Guangzhou 511443, China

<sup>3</sup> Australia-China Centre for Air Quality Science and Management (Guangdong), Guangzhou 511443, China

\* Correspondence: wanghao@jnu.edu.cn (H.W.); tbongue@jnu.edu.cn (B.W.)

**Table S1.** List the chemical properties of target species for ambient measurements.

| Compounds               | CAS        | Formula                           | Molar mass | Purity (%) | Producer                  |
|-------------------------|------------|-----------------------------------|------------|------------|---------------------------|
| Isoprene                | 78-79-5    | C <sub>5</sub> H <sub>8</sub>     | 68.1       | 100        | Linder, USA               |
| $\alpha$ -pinene        | 80-56-8    | C <sub>10</sub> H <sub>16</sub>   | 136.2      | 96.7       | Dr. Ehrenstorfer, Germany |
| camphene                | 79-92-5    | C <sub>10</sub> H <sub>16</sub>   | 136.2      | 95.0       | Supelco, USA              |
| sabinene                | 3387-41-5  | C <sub>10</sub> H <sub>16</sub>   | 136.2      | 97.9       | ChromaDex, USA            |
| $\beta$ -Myrcene        | 123-35-3   | C <sub>10</sub> H <sub>16</sub>   | 136.2      | 95.0       | ChromaDex, USA            |
| $\beta$ -pinene         | 127-91-3   | C <sub>10</sub> H <sub>16</sub>   | 136.2      | 98.8       | Dr. Ehrenstorfer, Germany |
| 2-carene                | 4497-92-1  | C <sub>10</sub> H <sub>16</sub>   | 136.2      | 96.6       | ChromaDex, USA            |
| 3-carene                | 13466-78-9 | C <sub>10</sub> H <sub>16</sub>   | 136.2      | 92.6       | Dr. Ehrenstorfer, Germany |
| D-limonene              | 5989-27-5  | C <sub>10</sub> H <sub>16</sub>   | 136.2      | 92.3       | ChromaDex, USA            |
| p-Cymene                | 99-87-6    | C <sub>10</sub> H <sub>14</sub>   | 134.2      | 99.1       | Dr. Ehrenstorfer, Germany |
| Ocimene                 | 13877-91-3 | C <sub>10</sub> H <sub>16</sub>   | 136.2      | 98.0       | Supelco, USA              |
| Cineole                 | 470-82-6   | C <sub>10</sub> H <sub>18</sub> O | 154.3      | 98.7       | ANPLE, China              |
| $\gamma$ -terpinene     | 99-85-4    | C <sub>10</sub> H <sub>16</sub>   | 136.2      | 94.5       | Dr. Ehrenstorfer, Germany |
| Isolongifolene          | 1135-66-6  | C <sub>15</sub> H <sub>24</sub>   | 204.4      | 98.0       | Supelco, USA              |
| Longifolene             | 475-20-7   | C <sub>15</sub> H <sub>24</sub>   | 204.4      | 81.1       | ChromaDex, USA            |
| $\alpha$ -cedrene       | 469-61-4   | C <sub>15</sub> H <sub>24</sub>   | 204.4      | 94.7       | ChromaDex, USA            |
| $\beta$ -caryophyllene  | 87-44-5    | C <sub>15</sub> H <sub>24</sub>   | 204.4      | 98.0       | YuanyeBio, China          |
| $\alpha$ -caryophyllene | 6753-98-6  | C <sub>15</sub> H <sub>24</sub>   | 204.4      | 96.7       | ChromaDex, USA            |

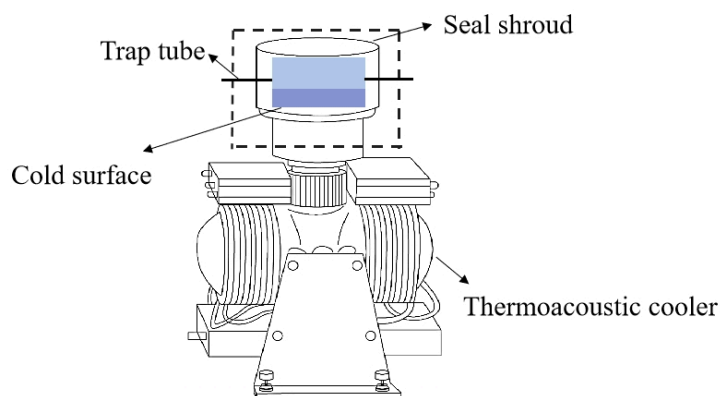

**Figure S1.** A drawing of thermoacoustic cooler which is used in this device.

**Table S2.** Detection limit (DL), repeatability and their mixing ratios (mean concentration  $\pm$  standard deviation) (ppbv) of measured VOC compounds in the air of Guangzhou sie at June 2022.

| Species                | R <sup>2</sup> | DL (ppbv) | Repeatability | AVG               |
|------------------------|----------------|-----------|---------------|-------------------|
| <b>Alkanes (n=29)</b>  |                |           |               |                   |
| Ethane                 | 0.999          | 0.036     | 1.8%          | 1.67 $\pm$ 0.862  |
| Propane                | 0.999          | 0.016     | 1.0%          | 3.58 $\pm$ 2.43   |
| iso-Butane             | 0.999          | 0.012     | 0.8%          | 2.08 $\pm$ 2.36   |
| n-Butane               | 0.999          | 0.020     | 0.4%          | 3.33 $\pm$ 2.28   |
| Cyclopentane           | 0.999          | 0.008     | 0.2%          | 0.236 $\pm$ 0.181 |
| iso-Pentane            | 0.999          | 0.012     | 0.1%          | 5.48 $\pm$ 5.44   |
| n-Pentane              | 0.999          | 0.010     | 1.3%          | 5.40 $\pm$ 6.31   |
| 2,2-Dimethylbutane     | 0.996          | 0.010     | 2.0%          | 0.228 $\pm$ 0.247 |
| 2,3-Dimethylbutane     | 0.999          | 0.015     | 1.3%          | 0.192 $\pm$ 1.069 |
| 2-Methylpentane        | 0.998          | 0.012     | 1.6%          | 0.807 $\pm$ 0.771 |
| 3-Methylpentane        | 0.998          | 0.012     | 2.4%          | 0.790 $\pm$ 0.696 |
| n-Hexane               | 0.997          | 0.008     | 1.4%          | 1.05 $\pm$ 1.04   |
| 2,4-Dimethylpentane    | 0.999          | 0.009     | 1.4%          | 0.123 $\pm$ 0.105 |
| Methylcyclopentane     | 0.997          | 0.008     | 1.9%          | 0.439 $\pm$ 0.376 |
| 2-Methylhexane         | 0.998          | 0.012     | 1.3%          | 0.553 $\pm$ 0.465 |
| 2,3-Dimethylpentane    | 0.999          | 0.013     | 1.8%          | 0.153 $\pm$ 0.129 |
| Cyclohexane            | 0.999          | 0.011     | 1.8%          | 0.133 $\pm$ 0.102 |
| 3-Methylhexane         | 0.998          | 0.009     | 1.1%          | 0.362 $\pm$ 0.310 |
| 2,2,4-Trimethylpentane | 0.998          | 0.003     | 1.6%          | 0.135 $\pm$ 0.119 |
| n-Heptane              | 0.998          | 0.009     | 1.9%          | 0.250 $\pm$ 0.196 |
| Methylcyclohexane      | 0.997          | 0.013     | 2.4%          | 0.142 $\pm$ 0.113 |
| 2,3,4-Trimethylpentane | 0.998          | 0.010     | 1.3%          | 0.044 $\pm$ 0.032 |
| 2-Methylheptane        | 0.999          | 0.010     | 1.6%          | 0.038 $\pm$ 0.030 |
| 3-Methylheptane        | 0.999          | 0.009     | 1.5%          | 0.043 $\pm$ 0.033 |
| n-Octane               | 0.999          | 0.009     | 1.6%          | 0.084 $\pm$ 0.052 |
| Nonane                 | 0.997          | 0.011     | 1.8%          | 0.087 $\pm$ 0.043 |
| n-Decane               | 0.998          | 0.009     | 1.5%          | 0.040 $\pm$ 0.020 |
| n-Undecane             | 0.995          | 0.011     | 1.7%          | 0.057 $\pm$ 0.028 |
| n-Dodecane             | 0.988          | 0.021     | 5.5%          | 0.000 $\pm$ 0.000 |
| <b>Alkenes (n=11)</b>  |                |           |               |                   |
| Ethylene               | 0.999          | 0.039     | 1.2%          | 1.52 $\pm$ 0.780  |
| Propylene              | 0.997          | 0.018     | 2.8%          | 0.222 $\pm$ 0.171 |
| trans-2-Butene         | 0.998          | 0.009     | 1.7%          | 0.313 $\pm$ 0.593 |
| 1-Butene               | 0.998          | 0.020     | 1.6%          | 0.161 $\pm$ 0.095 |
| cis-2-Butene           | 0.998          | 0.018     | 1.7%          | 0.071 $\pm$ 0.229 |
| 1,3-Butadiene          | 0.998          | 0.014     | 1.4%          | 0.026 $\pm$ 0.029 |
| Isbutene               | 0.995          | 0.012     | 2.1%          | 0.650 $\pm$ 0.455 |
| 1-Pentene              | 0.998          | 0.019     | 1.4%          | 0.059 $\pm$ 0.102 |
| trans-2-Pentene        | 0.999          | 0.009     | 1.6%          | 0.077 $\pm$ 0.104 |

|                           |       |       |       |               |
|---------------------------|-------|-------|-------|---------------|
| cis-2-Pentene             | 0.997 | 0.006 | 3.9%  | 0.021 ± 0.028 |
| 1-Hexene                  | 0.998 | 0.013 | 1.8%  | 0.090 ± 0.053 |
| <b>Alkynes (n=1)</b>      |       |       |       |               |
| Acetylene                 | 0.997 | 0.039 | 3.5%  | 1.01 ± 0.737  |
| <b>Carbonyls (n=12)</b>   |       |       |       |               |
| Acrolein                  | 0.988 | 0.022 | 6.3%  | 0.076 ± 0.072 |
| Propanal                  | 0.998 | 0.030 | 5.4%  | 0.257 ± 0.183 |
| Acetone                   | 0.998 | 0.013 | 1.5%  | 0.154 ± 0.140 |
| MTBE                      | 0.999 | 0.010 | 4.9%  | 0.710 ± 0.975 |
| Methacrolein              | 0.997 | 0.009 | 3.4%  | 0.055 ± 0.050 |
| n-Butanal                 | 0.999 | 0.012 | 8.6%  | 0.159 ± 0.106 |
| MethylVinylKetone         | 0.995 | 0.010 | 6.5%  | 0.203 ± 0.163 |
| MethylEthylKetone         | 0.997 | 0.011 | 5.5%  | 0.179 ± 0.119 |
| 2-Pentanone               | 0.988 | 0.025 | 9.2%  | 0.000 ± 0.000 |
| Pentanal                  | 0.956 | 0.022 | 10.3% | 0.123 ± 0.114 |
| 3-Pentanone               | 0.957 | 0.032 | 13.9% | 0.000 ± 0.000 |
| Hexanal                   | 0.950 | 0.016 | 14.7% | 1.30 ± 0.832  |
| <b>Aromatics (n=16)</b>   |       |       |       |               |
| Benzene                   | 0.998 | 0.007 | 1.3%  | 0.303 ± 0.223 |
| Toluene                   | 0.999 | 0.006 | 1.4%  | 2.73 ± 2.36   |
| Ethylbenzene              | 0.999 | 0.009 | 1.7%  | 0.652 ± 0.531 |
| m/p-Xylene                | 0.998 | 0.008 | 1.5%  | 1.99 ± 2.83   |
| o-Xylene                  | 0.998 | 0.007 | 1.3%  | 0.852 ± 0.734 |
| Styrene                   | 0.998 | 0.008 | 1.6%  | 0.343 ± 0.328 |
| Isopropylbenzene          | 0.998 | 0.007 | 1.6%  | 0.030 ± 0.018 |
| n-Propylbenzene           | 0.999 | 0.009 | 1.8%  | 0.027 ± 0.016 |
| m-Ethyltoluene            | 0.999 | 0.015 | 1.5%  | 0.053 ± 0.039 |
| p-Ethyltoluene            | 0.993 | 0.014 | 0.5%  | 0.033 ± 0.022 |
| 1,3,5-Trimethylbenzene    | 0.999 | 0.020 | 0.8%  | 0.027 ± 0.020 |
| o-Ethyltoluene            | 0.999 | 0.010 | 0.9%  | 0.033 ± 0.022 |
| 1,2,4-Trimethylbenzene    | 0.993 | 0.029 | 0.8%  | 0.107 ± 0.077 |
| 1,2,3-Trimethylbenzene    | 0.995 | 0.012 | 0.7%  | 0.039 ± 0.027 |
| m-Diethylbenzene          | 0.998 | 0.060 | 1.0%  | 0.013 ± 0.008 |
| p-Diethylbenzene          | 0.982 | 0.050 | 7.2%  | 0.030 ± 0.019 |
| <b>Haloalkane (n=31)</b>  |       |       |       |               |
| Freon-114                 | 0.998 | 0.025 | 0.8%  | 0.021 ± 0.005 |
| Chloromethane             | 0.999 | 0.020 | 2.0%  | 0.160 ± 0.187 |
| Vinylchloride             | 0.999 | 0.023 | 1.0%  | 0.170 ± 0.048 |
| Bromomethane              | 0.999 | 0.019 | 1.0%  | 0.004 ± 0.002 |
| Chloroethane              | 0.998 | 0.020 | 1.1%  | 0.002 ± 0.004 |
| Freon-11                  | 0.976 | 0.015 | 4.3%  | 0.362 ± 0.054 |
| 1,1-Dichloroethene        | 0.999 | 0.017 | 1.0%  | 0.001 ± 0.005 |
| Freon-113                 | 0.998 | 0.009 | 1.2%  | 0.069 ± 0.013 |
| Dichloromethane           | 0.996 | 0.026 | 1.2%  | 1.97±1.61     |
| 1,1-Dichloroethane        | 0.999 | 0.024 | 1.0%  | 0.004 ± 0.004 |
| cis-1,2-Dichloroethene    | 0.999 | 0.009 | 0.8%  | 0.005 ± 0.003 |
| Chloroform                | 0.958 | 0.026 | 5.1%  | 0.060 ± 0.033 |
| 1,1,1-Trichloroethane     | 0.988 | 0.015 | 3.5%  | 0.002 ± 0.002 |
| CarbonTetrachloride       | 0.999 | 0.010 | 4.9%  | 0.074 ± 0.018 |
| 1,2-Dichloroethane        | 0.997 | 0.031 | 1.0%  | 0.115 ± 0.095 |
| Trichloroethylene         | 0.999 | 0.024 | 1.3%  | 0.119 ± 0.167 |
| 1,2-Dichloropropane       | 0.998 | 0.016 | 1.6%  | 0.081 ± 0.073 |
| Bromodichloromethane      | 0.995 | 0.023 | 2.0%  | 0.002 ± 0.003 |
| trans-1,3-Dichloropropene | 0.997 | 0.033 | 5.8%  | 0.025 ± 0.011 |
| cis-1,3-Dichloropropene   | 0.998 | 0.034 | 2.0%  | 0.001 ± 0.003 |
| 1,1,2-Trichloroethane     | 0.998 | 0.015 | 1.5%  | 0.014 ± 0.011 |
| Tetrachloroethylene       | 0.998 | 0.031 | 1.4%  | 0.054 ± 0.045 |
| 1,2-Dibromoethane         | 0.998 | 0.028 | 2.0%  | 0.001 ± 0.004 |
| Chlorobenzene             | 0.995 | 0.033 | 1.9%  | 0.003 ± 0.003 |
| Bromoform                 | 0.991 | 0.030 | 2.1%  | 0.004 ± 0.005 |

|                           |       |       |      |               |
|---------------------------|-------|-------|------|---------------|
| 1,1,2,2-Tetrachloroethane | 0.991 | 0.021 | 2.0% | 0.002 ± 0.003 |
| 1,3-Dichlorobenzene       | 0.995 | 0.021 | 2.0% | 0.003 ± 0.003 |
| 1,4-Dichlorobenzene       | 0.997 | 0.011 | 1.9% | 0.024 ± 0.019 |
| BenzylChloride            | 0.993 | 0.038 | 5.9% | 0.001 ± 0.001 |
| 1,2-Dichlorobenzene       | 0.995 | 0.017 | 2.0% | 0.003 ± 0.004 |
| Acetonitrile              | 0.993 | 0.043 | 4.5% | 0.326 ± 0.320 |
| <b>BVOCs (n=4)</b>        |       |       |      |               |
| Isoprene                  | 0.998 | 0.007 | 1.6% | 1.15 ± 0.511  |
| α-pinene                  | 0.994 | 0.004 | 3.8% | 0.105 ± 0.048 |
| β-pinene                  | 0.994 | 0.004 | 3.7% | 0.016 ± 0.006 |
| D-limonene                | 0.993 | 0.005 | 5.3% | 0.013 ± 0.007 |

**Table S3.** The optimization results water trap temperature, desorption temperature and desorption time of target analytes. The number of repetitions of each analysis was 3 times.

| The optimization results of water trap temperature of target analytes |                                               |                      |                      |
|-----------------------------------------------------------------------|-----------------------------------------------|----------------------|----------------------|
| Compound                                                              | 0 °C (Average <sup>a</sup> ±SD <sup>b</sup> ) | -20 °C (Average ±SD) | -40 °C (Average ±SD) |
| α-Pinene                                                              | 4.22 ± 0.012                                  | 4.47 ± 0.018         | 4.63 ± 0.012         |
| Camphene                                                              | 3.37 ± 0.009                                  | 3.61 ± 0.019         | 3.73 ± 0.009         |
| Sabinene                                                              | 4.41 ± 0.016                                  | 4.58 ± 0.010         | 4.77 ± 0.016         |
| β-Myrcene                                                             | 4.40 ± 0.016                                  | 4.58 ± 0.010         | 4.76 ± 0.016         |
| β-Pinene                                                              | 4.40 ± 0.016                                  | 4.58 ± 0.010         | 4.77 ± 0.016         |
| 2-Carene                                                              | 4.48 ± 0.007                                  | 4.71 ± 0.013         | 4.89 ± 0.007         |
| 3-Carene                                                              | 4.63 ± 0.010                                  | 4.92 ± 0.006         | 5.12 ± 0.010         |
| D-limonene                                                            | 4.24 ± 0.025                                  | 4.34 ± 0.031         | 4.57 ± 0.025         |
| p-Cymene                                                              | 5.33 ± 0.013                                  | 5.49 ± 0.004         | 5.51 ± 0.013         |
| Ocimene                                                               | 4.40 ± 0.016                                  | 4.52 ± 0.003         | 4.59 ± 0.016         |
| Cineole                                                               | 4.84 ± 0.074                                  | 4.57 ± 0.021         | 4.48 ± 0.074         |
| γ-Terpinene                                                           | 4.69 ± 0.016                                  | 4.85 ± 0.006         | 5.00 ± 0.016         |
| Isolongifolene                                                        | 4.67 ± 0.042                                  | 4.73 ± 0.059         | 4.12 ± 0.042         |
| Longifolene                                                           | 4.55 ± 0.010                                  | 4.30 ± 0.079         | 3.60 ± 0.010         |
| α-Cedrene                                                             | 4.86 ± 0.039                                  | 4.62 ± 0.082         | 3.92 ± 0.039         |
| β-Caryophyllene                                                       | 4.32 ± 0.035                                  | 3.81 ± 0.093         | 2.97 ± 0.035         |
| α-Caryophyllene                                                       | 4.59 ± 0.086                                  | 3.65 ± 0.106         | 2.90 ± 0.086         |
| The optimization results of desorption temperature of target analytes |                                               |                      |                      |
| Compound                                                              | 150 °C (Average ±SD)                          | 200 °C (Average ±SD) | 250 °C (Average ±SD) |
| α-Pinene                                                              | 4.69 ± 0.030                                  | 4.84 ± 0.070         | 4.81 ± 0.042         |
| Camphene                                                              | 3.76 ± 0.030                                  | 3.87 ± 0.051         | 3.85 ± 0.037         |
| Sabinene                                                              | 4.83 ± 0.022                                  | 5.01 ± 0.061         | 4.98 ± 0.040         |
| β-Myrcene                                                             | 4.83 ± 0.021                                  | 5.01 ± 0.061         | 4.98 ± 0.040         |

|                         |                  |                  |                  |
|-------------------------|------------------|------------------|------------------|
| $\beta$ -Pinene         | $4.83 \pm 0.022$ | $5.01 \pm 0.061$ | $4.98 \pm 0.040$ |
| 2-Carene                | $4.92 \pm 0.018$ | $5.08 \pm 0.058$ | $5.05 \pm 0.033$ |
| 3-Carene                | $5.16 \pm 0.017$ | $5.32 \pm 0.056$ | $5.30 \pm 0.032$ |
| D-limonene              | $4.58 \pm 0.011$ | $4.69 \pm 0.073$ | $4.72 \pm 0.052$ |
| p-Cymene                | $5.74 \pm 0.012$ | $5.90 \pm 0.048$ | $5.89 \pm 0.028$ |
| Ocimene                 | $4.74 \pm 0.016$ | $4.90 \pm 0.055$ | $4.87 \pm 0.032$ |
| Cineole                 | $4.76 \pm 0.016$ | $4.89 \pm 0.008$ | $5.04 \pm 0.043$ |
| $\gamma$ -Terpinene     | $5.09 \pm 0.013$ | $5.26 \pm 0.057$ | $5.26 \pm 0.031$ |
| Isolongifolene          | $4.98 \pm 0.013$ | $5.12 \pm 0.022$ | $5.16 \pm 0.024$ |
| Longifolene             | $4.57 \pm 0.019$ | $4.71 \pm 0.047$ | $4.78 \pm 0.045$ |
| $\alpha$ -Cedrene       | $4.92 \pm 0.019$ | $5.09 \pm 0.043$ | $5.18 \pm 0.048$ |
| $\beta$ -Caryophyllene  | $4.08 \pm 0.036$ | $4.27 \pm 0.060$ | $4.42 \pm 0.076$ |
| $\alpha$ -Caryophyllene | $3.97 \pm 0.047$ | $4.23 \pm 0.032$ | $4.38 \pm 0.139$ |

---

| The optimization results of desorption time of target analytes |                             |                             |                             |                             |                             |                             |
|----------------------------------------------------------------|-----------------------------|-----------------------------|-----------------------------|-----------------------------|-----------------------------|-----------------------------|
| Compound                                                       | 1 min<br>(Average $\pm$ SD) | 2 min (Average<br>$\pm$ SD) | 3 min<br>(Average $\pm$ SD) | 4 min (Average<br>$\pm$ SD) | 5 min<br>(Average $\pm$ SD) | 7 min (Average<br>$\pm$ SD) |
| $\alpha$ -Pinene                                               | 4.88 $\pm$ 0.031            | 4.99 $\pm$ 0.031            | 5.01 $\pm$ 0.031            | 4.99 $\pm$ 0.031            | 4.94 $\pm$ 0.031            | 4.86 $\pm$ 0.031            |
| Camphene                                                       | 3.94 $\pm$ 0.026            | 4.08 $\pm$ 0.026            | 4.09 $\pm$ 0.026            | 4.06 $\pm$ 0.026            | 3.99 $\pm$ 0.026            | 3.88 $\pm$ 0.026            |
| Sabinene                                                       | 4.80 $\pm$ 0.067            | 5.10 $\pm$ 0.067            | 5.12 $\pm$ 0.067            | 5.11 $\pm$ 0.067            | 5.06 $\pm$ 0.067            | 5.01 $\pm$ 0.067            |
| $\beta$ -Myrcene                                               | 4.79 $\pm$ 0.067            | 5.10 $\pm$ 0.067            | 5.12 $\pm$ 0.067            | 5.11 $\pm$ 0.067            | 5.06 $\pm$ 0.067            | 5.01 $\pm$ 0.067            |
| $\beta$ -Pinene                                                | 4.79 $\pm$ 0.067            | 5.10 $\pm$ 0.067            | 5.12 $\pm$ 0.067            | 5.11 $\pm$ 0.067            | 5.06 $\pm$ 0.067            | 5.01 $\pm$ 0.067            |
| 2-Carene                                                       | 4.92 $\pm$ 0.046            | 5.13 $\pm$ 0.046            | 5.15 $\pm$ 0.046            | 5.14 $\pm$ 0.046            | 5.11 $\pm$ 0.046            | 5.07 $\pm$ 0.046            |
| 3-Carene                                                       | 5.13 $\pm$ 0.049            | 5.36 $\pm$ 0.049            | 5.37 $\pm$ 0.049            | 5.37 $\pm$ 0.049            | 5.34 $\pm$ 0.049            | 5.31 $\pm$ 0.049            |
| D-limonene                                                     | 4.36 $\pm$ 0.089            | 4.76 $\pm$ 0.089            | 4.80 $\pm$ 0.089            | 4.79 $\pm$ 0.089            | 4.77 $\pm$ 0.089            | 4.74 $\pm$ 0.089            |
| p-Cymene                                                       | 5.46 $\pm$ 0.106            | 5.88 $\pm$ 0.106            | 5.93 $\pm$ 0.106            | 5.94 $\pm$ 0.106            | 5.92 $\pm$ 0.106            | 5.91 $\pm$ 0.106            |
| Ocimene                                                        | 4.43 $\pm$ 0.112            | 4.92 $\pm$ 0.112            | 4.96 $\pm$ 0.112            | 4.96 $\pm$ 0.112            | 4.93 $\pm$ 0.112            | 4.90 $\pm$ 0.112            |
| Cineole                                                        | 4.12 $\pm$ 0.150            | 4.55 $\pm$ 0.150            | 4.84 $\pm$ 0.150            | 4.95 $\pm$ 0.150            | 5.15 $\pm$ 0.150            | 5.25 $\pm$ 0.150            |
| $\gamma$ -Terpinene                                            | 4.88 $\pm$ 0.084            | 5.29 $\pm$ 0.084            | 5.32 $\pm$ 0.084            | 5.31 $\pm$ 0.084            | 5.29 $\pm$ 0.084            | 5.27 $\pm$ 0.084            |
| Isolongifolene                                                 | 2.47 $\pm$ 0.086            | 4.04 $\pm$ 0.086            | 4.75 $\pm$ 0.086            | 5.02 $\pm$ 0.086            | 5.18 $\pm$ 0.086            | 5.20 $\pm$ 0.086            |
| Longifolene                                                    | 2.30 $\pm$ 0.233            | 3.34 $\pm$ 0.233            | 4.21 $\pm$ 0.233            | 4.60 $\pm$ 0.233            | 4.83 $\pm$ 0.233            | 4.89 $\pm$ 0.233            |
| $\alpha$ -Cedrene                                              | 2.73 $\pm$ 0.070            | 3.57 $\pm$ 0.070            | 4.53 $\pm$ 0.070            | 4.97 $\pm$ 0.070            | 5.21 $\pm$ 0.070            | 5.29 $\pm$ 0.070            |
| $\beta$ -Caryophyllene                                         | 1.97 $\pm$ 0.069            | 2.58 $\pm$ 0.069            | 3.60 $\pm$ 0.069            | 4.19 $\pm$ 0.069            | 4.50 $\pm$ 0.069            | 4.61 $\pm$ 0.069            |
| $\alpha$ -Caryophyllene                                        | 2.60 $\pm$ 0.038            | 3.02 $\pm$ 0.038            | 3.36 $\pm$ 0.038            | 4.14 $\pm$ 0.038            | 4.56 $\pm$ 0.038            | 4.81 $\pm$ 0.038            |

<sup>a</sup> Average: The average of the Log (Area). <sup>b</sup>SD: Standard deviation.

**Table S4.** Comparisons the average mixing ratios of BVOCs measured in Guangzhou and other sites in China.

| References        | Guangzhou<br>Jun. 2022         | Guangzhou<br>Jun. 2011-May.<br>2012 | Guangzhou<br>Aug. 29, 2020 | Guangzhou*<br>Aug. 30-31,<br>2020 | Hongkong<br>Jun.-Jul. 2007 | Beijing<br>Jun.-Aug.<br>2014 | Xi'an<br>May. 2017                |
|-------------------|--------------------------------|-------------------------------------|----------------------------|-----------------------------------|----------------------------|------------------------------|-----------------------------------|
|                   | This study                     | [1]                                 | [2]                        | [2]                               | [3]                        | [4]                          | [5]                               |
| Sampling site     | Suburb                         | Forest park                         | Suburb                     | Suburb                            | Urban-park                 | Urban                        | Mountain                          |
| Sampling method   | Online                         | Canister samples                    | Canister samples           | Canister samples                  | Canister samples           | Online                       | Cartridges                        |
| Enrichment method | Cryotrap-thermoacoustic cooler | Cryotrap-liquid nitrogen            | Cryotrap-liquid nitrogen   | Cryotrap-liquid nitrogen          | Cryotrap-liquid argon      | solid adsorbents             | Tenax\Carbograph-solid adsorbents |
| Analytical method | GC-MS/FID                      | GC-FID                              | GC-MS/FID                  | GC-MS/FID                         | GC-FID                     | GC-FID                       | Offline-TD-GC-MS/FID              |
| BVOCs             | Concentrations                 |                                     |                            |                                   |                            |                              |                                   |
| Isoprene          | 1.15                           | 4.90                                | 1.21                       | 1.75                              | 1.33                       | 0.927                        | 1.30                              |
| $\alpha$ -pinene  | 0.105                          | 0.184                               | 0.009                      | 0.023                             | -                          | 0.018                        | -                                 |
| $\beta$ -pinene   | 0.016                          | -                                   | 0.016                      | 0.017                             | 0.24                       | -                            | -                                 |
| D-limonene        | 0.013                          | -                                   | -                          | -                                 | 0.19                       | -                            | -                                 |
| Monoterpenes      | 0.13                           | 0.184                               | 0.025                      | 0.04                              | 0.43                       | 0.018                        | 0.21                              |

\* pollution.

- data were not available in the relative reference.

**Table S5.** Comparisons of VOCs with high levels in Guangzhou with other cities in China.

|                 | Guangzhou      | Guangzhou | Guangzhou | Guangzhou | Wanqingsha | Beijing | Shanghai | Wuhan |
|-----------------|----------------|-----------|-----------|-----------|------------|---------|----------|-------|
| References      | This study     | [6]       | [7]       | [2]       | [8]        | [9]     | [10]     | [11]  |
| Sampling site   | Suburb         | Suburb    | Urban     | Suburb    | Suburb     | Suburb  | Urban    | Urban |
| Top ten VOCs    | Concentrations |           |           |           |            |         |          |       |
| iso-Pentane     | 5.48           | 1.72      | 2.52      | 1.18      | 2.31       | 0.79    | 1.03     | 0.94  |
| n-Pentane       | 5.40           | 1.37      | 1.78      | 0.52      | 1.69       | 0.33    | 0.55     | 0.44  |
| Propane         | 3.58           | 4.34      | 3.90      | 3.67      | 4.63       | 1.97    | 2.99     | 5.49  |
| n-Butane        | 3.33           | 3.07      | 3.62      | 3.82      | 3.86       | 0.81    | 1.57     | 1.74  |
| Toluene         | 2.73           | 4.59      | 2.97      | 1.42      | 4.90       | 0.39    | 1.31     | 0.71  |
| iso-Butane      | 2.08           | 2.67      | 1.82      | 2.10      | 2.22       | 0.47    | 0.91     | 1.09  |
| m/p-Xylene      | 1.99           | 1.41      | 1.44      | 1.15      | 2.75       | 0.27    | 1.07     | 0.27  |
| Dichloromethane | 1.97           | -         | -         | -         | -          | 0.68    | 1.57     | 1.16  |
| Ethane          | 1.67           | 3.66      | 1.43      | 1.52      | 2.40       | 1.84    | 3.69     | 3.91  |
| Ethylene        | 1.52           | 2.99      | 1.21      | 0.61      | 1.56       | 0.69    | 1.53     | 1.97  |

\* pollution.

- data were not available in the relative reference.

## References

1. Yu, Y.X.; Wen, S.; Lv, H.X.; Wang, X.M.; Sheng, G.; Fu, J.M. Diurnal variations of vocs and relative contribution to ozone in forest of guangzhou. *Environ. Sci. Technol.* **2009**, *32*, 94-98.
2. Wang, J.; Zhang, Y.L.; Xiao, S.X.; Wu, Z.F.; Wang, X.M. Ozone formation at a suburban site in the pearl river delta region, china: Role of biogenic volatile organic compounds. *Atmosphere* **2023**, *14*, 609.
3. Chen, H.W.; Ho, K.-F.; Lee, S.C.; Nichol, J.E. Biogenic volatile organic compounds (bvoc) in ambient air over hong kong: Analytical methodology and field measurement. *Int. J. Environ. Anal. Chem.* **2010**, *90*, 988-999.
4. Cheng, X.; Li, H.; Zhang, Y.; Li, Y.; Zhang, W.; Wang, X.; Bi, F.; Zhang, H.; Gao, J.; Chai, F., *et al.* Atmospheric isoprene and monoterpenes in a typical urban area of beijing: Pollution characterization, chemical reactivity and source identification. *J. Environ. Sci.* **2018**, *71*, 150-167.
5. Li, N.; He, Q.Y.; Greenberg, J.; Guenther, A.; Li, J.Y.; Cao, J.J.; Wang, J.; Liao, H.; Wang, Q.Y.; Zhang, Q. Impacts of biogenic and anthropogenic emissions on summertime ozone formation in the guanzhong basin, china. *Atmos. Chem. Phys.* **2018**, *18*, 7489-7507.
6. Zou, Y.; Deng, X.J.; Zhu, D.; Gong, D.C.; Wang, H.; Li, F.; Tan, H.B.; Deng, T.; Mai, B.R.; Liu, X.T., *et al.* Characteristics of 1 year of observational data of vocs, nox and o3 at a suburban site in guangzhou, china. *Atmos. Chem. Phys.* **2015**, *15*, 6625-6636.
7. Yang, W.Q.; Yu, Q.Q.; Pei, C.L.; Liao, C.H.; Liu, J.J.; Zhang, J.P.; Zhang, Y.L.; Qiu, X.N.; Zhang, T.; Zhang, Y.B., *et al.* Characteristics of volatile organic compounds in the pearl river delta region, china: Chemical reactivity, source, and emission regions. *Atmosphere* **2021**, *13*, 9.
8. Meng, Y.; Song, J.W.; Zeng, L.W.; Zhang, Y.Y.; Zhao, Y.; Liu, X.F.; Guo, H.; Zhong, L.J.; Ou, Y.B.; Zhou, Y., *et al.* Ambient volatile organic compounds at a receptor site in the pearl river delta region: Variations, source apportionment and effects on ozone formation. *J. Environ. Sci.* **2022**, *111*, 104-117.
9. Wu, Y.J.; Fan, X.L.; Liu, Y.; Zhang, J.Q.; Wang, H.; Sun, L.N.; Fang, T.G.; Mao, H.J.; Hu, J.; Wu, L., *et al.* Source apportionment of vocs based on photochemical loss in summer at a suburban site in beijing. *Atmos. Environ.* **2023**, *293*, 119459.



- 
10. Liu, Y.H.; Wang, H.L.; Jing, S.G.; Gao, Y.Q.; Peng, Y.R.; Lou, S.R.; Cheng, T.T.; Tao, S.K.; Li, L.; Li, Y.J., *et al.* Characteristics and sources of volatile organic compounds (vocs) in shanghai during summer: Implications of regional transport. *Atmos. Environ.* **2019**, *215*, 116902.
  11. Hui, L.R.; Liu, X.G.; Tan, Q.W.; Feng, M.; An, J.L.; Qu, Y.; Zhang, Y.H.; Deng, Y.J.; Zhai, R.X.; Wang, Z. Voc characteristics, chemical reactivity and sources in urban wuhan, central china. *Atmos. Environ.* **2020**, *224*, 117340.
